# Supplementary material for: Complementary iTRAQ proteomics and RNA-seq transcriptomics reveal multiple levels of regulation in response to nitrogen starvation in Synechocystis sp. PCC 6803
Source: Royal Society of Chemistry journal article supplement (doi:10.1039/c3mb70188c), 2013-07-23
Supplement: c3mb70188c_2.pdf [file c3mb70188c_2.pdf]

**Table S1 Primers used in this study for knockout mutant construction**

|                   |                                                          |
|-------------------|----------------------------------------------------------|
| <i>Cm-F1</i>      | 5'-AGCTGATAGAAACAGAAGCCACTGG-3'                          |
| <i>Cm-R1</i>      | 5'-TTACGCCCCGCCCTGCCACTCATCG-3'                          |
| <i>sll0258-F1</i> | 5'-GGCAATGGCCTGGGGCAAGT-3'                               |
| <i>sll0258-R1</i> | 5'-CCAGTGGCTTCTGTTTCTATCAGCTAGCGTTTCACAAAGGTTCTCCTCAA-3' |
| <i>sll0258-F3</i> | 5'-CGATGAGTGGCAGGGCGGGGCGTAAGAACGGTGGGGTGGCACCAT-3'      |
| <i>sll0258-R3</i> | 5'-TCCTCCACCATTGCCAGCCTCA-3'                             |
