# Supplementary material for: Complementary iTRAQ proteomics and RNA-seq transcriptomics reveal multiple levels of regulation in response to nitrogen starvation in Synechocystis sp. PCC 6803
Source: Royal Society of Chemistry journal article supplement (doi:10.1039/c3mb70188c), 2013-07-23
Supplement: c3mb70188c_3.pdf [file c3mb70188c_3.pdf]

**Table S2 B Up-regulated proteins (fold changes) revealed by quantitative I TRAQ proteomic a**

| <b>Gene</b> | <b>Description</b>                                              | <b>24h</b> | <b>48h</b> |
|-------------|-----------------------------------------------------------------|------------|------------|
| sll1945     | 1-deoxy-xylulose 5-phosphate synthase                           | 1.59       |            |
| slr2130     | 3-dehydroquinate synthase                                       | 1.78       |            |
| ssl3436     | 50s ribosomal protein l29                                       | 1.50       |            |
| sll0480     | aspartate aminotransferase related protein                      | 1.57       |            |
| sll0208     | conserved hypothetical protein                                  | 1.57       |            |
| slr0609     | conserved hypothetical protein                                  | 1.61       |            |
| ssr3451     | cytochrome b559 alpha chain                                     | 1.64       |            |
| smr0006     | cytochrome b559 beta chain                                      | 1.79       |            |
| sll0018     | fructose-bisphosphate aldolase (ec 4.1.2.13)                    | 1.82       |            |
| slr0151     | hypothetical protein                                            | 1.77       |            |
| sll1618     | hypothetical protein                                            | 1.52       |            |
| slr1472     | -identity                                                       | 1.84       |            |
| sll1363     | ketol-acid reductoisomerase (ec 1.1.1.86)                       | 1.75       |            |
| sll1743     | L11 protein                                                     | 2.36       |            |
| sll0947     | light repressed protein a                                       | 1.52       |            |
| sll0258     | low potential cytochrome C                                      | 1.97       |            |
| sll0629     | photosystem i reaction centre subunit x (psi-k)                 | 1.77       |            |
| sll1471     | phycobilisome rod-core linker polypeptide CpcG                  | 2.67       |            |
| slr0775     | protein-export membrane protein SecF, putative, putative        | 2.55       |            |
| slr1164     | ribonucleotide reductase alpha chain                            | 1.53       |            |
| slr0653     | RNA polymerase sigma factor rpod1                               | 1.59       |            |
| sll1931     | serine hydroxymethyltransferase                                 | 1.57       |            |
| sll1688     | threonine synthase                                              | 1.81       |            |
| sll0860     | conserved hypothetical protein                                  | 1.53       | 2.14       |
| slr0186     | 2-isopropylmalate synthase                                      | 1.88       | 1.92       |
| sll0336     | acetyl-coenzyme a carboxylase carboxyl transferase subunit beta | 1.58       | 2.17       |
| ssl2084     | acyl carrier protein                                            | 2.78       | 3.61       |
| slr0729     | conserved hypothetical protein                                  | 2.18       | 3.51       |
| slr2136     | conserved hypothetical protein                                  | 1.72       | 1.70       |
| slr1847     | conserved hypothetical protein                                  | 2.46       | 3.05       |
| ssl3364     | conserved hypothetical protein                                  | 1.53       | 3.24       |
| sll1214     | conserved hypothetical protein (orf349)                         | 2.67       | 2.17       |
| slr0923     | conserved hypothetical protein (orf99)                          | 2.78       | 2.16       |
| sll1185     | coproporphyrinogen III oxidase, aerobic                         | 2.00       | 2.02       |
| sll1663     | CpcE-related protein                                            | 1.66       | 2.16       |
| sll0504     | diaminopimelate decarboxylase                                   | 2.34       | 1.64       |
| sll1091     | geranylgeranyl hydrogenase                                      | 2.83       | 1.80       |
| slr0033     | glutamyl-tRNA (Gln) amidotransferase subunit C                  | 1.88       | 2.48       |
| slr0426     | GTP cyclohydrolase i                                            | 1.79       | 2.31       |
| sll0872     | hypothetical protein                                            | 2.56       | 2.85       |
| slr1853     | PcaC-like protein, putative                                     | 1.67       | 1.89       |
| sll1110     | peptide chain release factor RF-1                               | 1.76       | 1.66       |
| sll1994     | porphobilinogen synthase                                        | 2.18       | 2.87       |
| sll1019     | probable hydroxyacylglutathione hydrolase                       | 4.39       | 3.64       |
| sll0807     | ribulose-phosphate 3-epimerase (ec 5.1.3.1)                     | 1.67       | 1.72       |

|         |                                                       |      |       |
|---------|-------------------------------------------------------|------|-------|
| slr1417 | T10O24.11                                             | 1.85 | 3.62  |
| sll1980 | thiol:disulfide interchange protein txla              | 1.62 | 2.40  |
| sll0381 | hypothetical protein                                  |      | 2.01  |
| slr1761 | 12 kDa FK506-binding protein (fkBP) (peptidyl-prolyl) |      | 2.04  |
| ssl3436 | 50s ribosomal protein l29                             |      | 1.57  |
| slr0242 | bacterioferritin comigratory protein                  |      | 3.34  |
| sll1654 | conserved hypothetical protein                        |      | 1.74  |
| slr0823 | conserved hypothetical protein                        |      | 2.56  |
| sll1336 | conserved hypothetical protein                        |      | 1.69  |
| sll1734 | conserved hypothetical protein                        |      | 2.19  |
| ssl0352 | conserved hypothetical protein                        |      | 1.64  |
| slr0581 | conserved hypothetical protein                        |      | 2.08  |
| ssl1707 | conserved hypothetical protein                        |      | 2.92  |
| ssr3122 | conserved hypothetical protein                        |      | 2.61  |
| sll0634 | conserved hypothetical protein                        |      | 1.69  |
| ssr2998 | conserved hypothetical protein                        |      | 1.50  |
| sll0662 | conserved hypothetical protein                        |      | 1.85  |
| ssl2982 | conserved hypothetical protein (orf75)                |      | 1.92  |
| slr1828 | ferredoxin ii                                         |      | 2.43  |
| slr0739 | geranylgeranyl diphosphate synthase (SelGGPS)         |      | 1.66  |
| sll0057 | grpe protein , fragment-related                       |      | 1.62  |
| slr1600 | hypothetical protein                                  |      | 1.92  |
| ssr1853 | hypothetical protein                                  |      | 4.10  |
| slr1339 | hypothetical protein                                  |      | 1.56  |
| sll0630 | hypothetical protein                                  |      | 3.45  |
| slr0455 | hypothetical protein                                  |      | 2.17  |
| slr1431 | hypothetical protein                                  |      | 2.06  |
| slr0476 | hypothetical protein                                  |      | 1.69  |
| sll1620 | hypothetical protein                                  |      | 1.75  |
| sll1549 | hypothetical protein                                  |      | 2.06  |
| ssl0461 | hypothetical protein                                  |      | 1.73  |
| ssl0242 | hypothetical protein                                  |      | 10.31 |
| slr1160 | hypothetical protein                                  |      | 2.39  |
| slr0111 | hypothetical protein                                  |      | 1.90  |
| ssr3402 | hypothetical protein                                  |      | 2.11  |
| slr1915 | hypothetical protein                                  |      | 2.63  |
| sll0162 | hypothetical protein                                  |      | 1.57  |
| slr1970 | hypothetical protein                                  |      | 3.77  |
| slr1472 | -identity                                             |      | 1.92  |
| sll1074 | leucyl-tRNA synthetase                                |      | 2.73  |
| slr1198 | LsfA                                                  |      | 2.02  |
| slr1030 | Mg-Protoporphyrin IX                                  |      | 1.82  |
| sll1209 | M-protein, putative                                   |      | 1.61  |
| sll1732 | NADH dehydrogenase subunit 5                          |      | 2.18  |
| slr0043 | nrtC-like transporter protein (cmpC)                  |      | 1.91  |
| sll0199 | ntss01_ORF03920                                       |      | 4.44  |
| slr1887 | PBG-D (aa1-344)                                       |      | 1.86  |
| slr0394 | phosphoglycerate kinase                               |      | 2.39  |

|         |                                                                             |      |
|---------|-----------------------------------------------------------------------------|------|
| ssr2831 | photosystem i reaction centre subunit iv                                    | 2.39 |
| ssr3383 | phycobilisome 7.8 kd linker polypeptide, allophycocyanin-associated, core   | 1.57 |
| slr2051 | phycobilisome rod-core linker polypeptide cpcg                              | 2.13 |
| slr1783 | probable transcriptional regulator ycf29                                    | 1.82 |
| ssl0563 | product binds the terminal electron accepting Fe-S centers of photosystem I | 2.07 |
| slr1846 | promoter active fragment E3                                                 | 1.51 |
| slr0114 | regulatory protein, putative                                                | 1.77 |
| slr0194 | ribose 5-phosphate isomerase, putative                                      | 1.64 |
| sll0145 | ribosome recycling factor (ribosome releasing factor) (rrf)                 | 1.68 |
| sll1594 | rubisco operon transcriptional regulator                                    | 1.56 |
| sll0039 | similar to sir1042 protein of Synechocystis sp. strain PCC 6803             | 1.79 |
| slr1271 | teichoic acid biosynthesis protein a-related                                | 1.77 |
| slr1139 | thioredoxin                                                                 | 2.61 |
| slr1992 | vitami B12 transporter protein/glutathione peroxidase                       | 2.16 |

**nalysis**

**Table S2 A Down-regulated proteins (fold changes) revealed by quantitative I TRAQ p**

| <b>Gene</b> | <b>Description</b>                                                  | <b>N24</b> | <b>N48</b> |
|-------------|---------------------------------------------------------------------|------------|------------|
| sll0900     | ATP phosphoribosyltransferase                                       | 0.003      |            |
| slr0769     | conserved hypothetical protein                                      | 0.210      |            |
| slr0957     | hypothetical protein                                                | 0.219      |            |
| sll1080     | hypothetical 36.3 kd lipoprotein precursor, putative                | 0.295      |            |
| sll1757     | conserved hypothetical protein                                      | 0.583      |            |
| sll0783     | hypothetical protein                                                | 0.352      |            |
| ssl1918     | hypothetical protein                                                | 0.354      |            |
| sll0172     | hypothetical protein                                                | 0.369      |            |
| slr1735     | glutamine transport ATP-binding protein glnq                        | 0.373      |            |
| slr1171     | BsaA                                                                | 0.566      |            |
| slr0058     | hypothetical protein                                                | 0.567      |            |
| slr0518     | alpha-l-arabinofuranosidase b precursor b)-related                  | 0.433      |            |
| slr0374     | conserved hypothetical protein                                      | 0.459      |            |
| sll1426     | hypothetical protein                                                | 0.582      |            |
| slr2101     | conserved hypothetical protein                                      | 0.481      |            |
| sll1483     | transforming growth factor induced protein                          | 0.490      |            |
| slr1773     | hypothetical protein                                                | 0.561      |            |
| sll0779     | utilizing regulatory protein tutC                                   | 0.517      |            |
| sll1054     | conserved hypothetical protein                                      | 0.527      |            |
| sll1508     | UDP-3-0-acyl N-acetylglucosamine deacetylase                        | 0.537      |            |
| slr1678     | 50S ribosomal protein L21                                           | 0.528      |            |
| sll0051     | conserved hypothetical protein                                      | 0.533      |            |
| sll1933     | DnaJ1 protein                                                       | 0.534      |            |
| slr1693     | pilg protein, putative                                              | 0.603      |            |
| sll0103     | conserved hypothetical protein                                      | 0.613      |            |
| sll1089     | hypothetical protein                                                | 0.617      |            |
| slr1958     | hypothetical protein                                                | 0.623      |            |
| slr1410     | putative WD-repeat protein, putative                                | 0.623      |            |
| slr0201     | succinate dehydrogenase subunit C, putative                         | 0.628      |            |
| ssr1600     | putative anti-sigma factor antagonist, putative                     | 0.631      |            |
| slr2060     | hypothetical protein                                                | 0.641      |            |
| sll1981     | acetolactate synthase                                               | 0.643      |            |
| sll0753     | methylenetetrahydrofolate dehydrogenase                             | 0.646      |            |
| sll0470     | hypothetical protein                                                | 0.647      |            |
| sll0923     | putative transmembrane protein Wzc, putative                        | 0.651      |            |
| sll0180     | hypothetical 41.2 kd lipoprotein in hded-gada intergenic region pre | 0.653      |            |
| sll1837     | conserved hypothetical protein                                      | 0.654      |            |
| slr1924     | Alkaline D-peptidase                                                | 0.657      |            |
| sll0272     | hypothetical protein                                                | 0.663      |            |
| ssl2501     | hypothetical protein                                                | 0.136      | 0.081      |
| sll1330     | response regulator SrrB, putative                                   | 0.295      | 0.253      |
| sll1498     | ()                                                                  | 0.376      | 0.584      |
| slr1830     | poly-beta-hydroxybutyrate polymerase                                | 0.398      | 0.348      |
| sll1223     | hoxU                                                                | 0.399      | 0.362      |

|         |                                                                       |       |       |
|---------|-----------------------------------------------------------------------|-------|-------|
| slr1829 | conserved hypothetical protein                                        | 0.404 | 0.323 |
| sll1291 | ChpA, putative                                                        | 0.427 | 0.496 |
| slr0469 | cyanelle ribosomal protein S4                                         | 0.476 | 0.497 |
| sll0499 | hypothetical protein                                                  | 0.512 | 0.623 |
| sll1821 | chloroplast ribosomal protein L13                                     | 0.527 | 0.617 |
| sll1740 | ribosomal protein L19                                                 | 0.536 | 0.446 |
| slr1276 | hypothetical protein                                                  | 0.539 | 0.509 |
| sll0374 | urea/short-chain amide ABC transporter, ATP-binding protein, putative | 0.542 | 0.322 |
| slr1694 | appA protein                                                          | 0.548 | 0.476 |
| slr1289 | isocitrate dehydrogenase [nadp] (ec 1.1.1.42)                         | 0.554 | 0.380 |
| sll1811 | 50s ribosomal protein l18                                             | 0.558 | 0.468 |
| slr1258 | conserved hypothetical protein                                        | 0.563 | 0.492 |
| slr0369 | mexF                                                                  | 0.568 | 0.466 |
| sll1380 | conserved hypothetical protein (orf238)                               | 0.571 | 0.577 |
| sll0420 | urease beta subunit                                                   | 0.582 | 0.653 |
| sll0368 | pyrimidine operon regulatory protein PyrR                             | 0.585 | 0.589 |
| sll1388 | conserved hypothetical protein                                        | 0.597 | 0.659 |
| ssl3437 | 30s ribosomal protein s17                                             | 0.608 | 0.444 |
| sll1296 | ChpA, putative                                                        | 0.616 | 0.489 |
| slr1363 | conserved hypothetical protein                                        | 0.625 | 0.518 |
| sll1358 | conserved hypothetical protein                                        | 0.625 | 0.438 |
| slr1793 | transaldolase                                                         | 0.625 | 0.621 |
| sll1423 | NtcA                                                                  | 0.632 | 0.607 |
| slr1406 | hypothetical protein                                                  | 0.634 | 0.624 |
| slr1275 | hypothetical protein                                                  | 0.641 | 0.502 |
| slr1743 | NADH dehydrogenase                                                    | 0.647 | 0.449 |
| slr1753 | hypothetical protein                                                  | 0.652 | 0.513 |
| sll1118 | conserved hypothetical protein                                        | 0.653 | 0.601 |
| sll1097 | 30S ribosomal protein S7                                              | 0.654 | 0.575 |
| sll0781 | conserved hypothetical protein                                        | 0.656 | 0.371 |
| slr1881 | ()                                                                    |       | 0.528 |
| sll0528 | (), putative                                                          |       | 0.524 |
| slr0250 | 17.3 kd protein in mura-rpon intergenic region precursor, putative    |       | 0.575 |
| sll1817 | 30s ribosomal protein s11                                             |       | 0.520 |
| slr0628 | 30S ribosomal protein S14                                             |       | 0.518 |
| sll1804 | 30S ribosomal protein S3                                              |       | 0.513 |
| sll1809 | 30s ribosomal protein s8                                              |       | 0.335 |
| slr1994 | 3-oxoacyl-(acyl-carrier protein) reductase                            |       | 0.235 |
| sll1676 | 4-alpha-glucanotransferase (ec 2.4.1.25) (amylomaltase)               |       | 0.594 |
| sll1819 | 50s ribosomal protein l17                                             |       | 0.377 |
| sll1802 | 50s ribosomal protein l2                                              |       | 0.647 |
| sll1803 | 50s ribosomal protein l22                                             |       | 0.607 |
| sll1801 | 50s ribosomal protein l23                                             |       | 0.463 |
| ssr2799 | 50S ribosomal protein L27                                             |       | 0.552 |
| sll1800 | 50s ribosomal protein l4                                              |       | 0.563 |
| sll1810 | 50s ribosomal protein l6                                              |       | 0.521 |
| sll1082 | ABC transporter, ATP-binding protein                                  |       | 0.275 |
| sll1770 | ABC transporter, putative                                             |       | 0.525 |

|         |                                                                  |       |
|---------|------------------------------------------------------------------|-------|
| slr1993 | acetyl-coa acetyltransferase                                     | 0.325 |
| slr1898 | acetylglutamate kinase (n-acetylglutama)                         | 0.306 |
| slr1022 | acetylornithine aminotransferase                                 | 0.575 |
| sll1085 | aerobic glycerol-3-phosphate dehydrogenase, putative             | 0.629 |
| sll1270 | amino acid ABC transporter, permease protein                     | 0.277 |
| sll0224 | amino-acid abc transporter binding protein                       | 0.610 |
| sll0108 | ammonium transporter                                             | 0.234 |
| slr0585 | argininosuccinate synthase                                       | 0.433 |
| sll1327 | ATP synthase gamma chain                                         | 0.416 |
| slr1768 | B-cell receptor associated protein-related protein, putative     | 0.593 |
| sll1314 | c4-dicarboxylate-binding periplasmic protein precursor, putative | 0.397 |
| slr0257 | carboxyl terminal protease                                       | 0.564 |
| slr1751 | carboxyl terminal protease                                       | 0.552 |
| slr0798 | cation-transporting ATPase, P-type (pacS)                        | 0.584 |
| sll1822 | chloroplast 30s ribosomal protein s9                             | 0.344 |
| slr0929 | chromosome partitioning protein, ParA family                     | 0.585 |
| sll0401 | citrate synthase                                                 | 0.420 |
| sll0185 | conserved hypothetical protein                                   | 0.361 |
| sll0335 | conserved hypothetical protein                                   | 0.254 |
| sll0596 | conserved hypothetical protein                                   | 0.413 |
| sll0749 | conserved hypothetical protein                                   | 0.666 |
| sll0772 | conserved hypothetical protein                                   | 0.608 |
| sll0788 | conserved hypothetical protein                                   | 0.264 |
| sll0997 | conserved hypothetical protein                                   | 0.573 |
| sll1039 | conserved hypothetical protein                                   | 0.400 |
| sll1218 | conserved hypothetical protein                                   | 0.591 |
| sll1252 | conserved hypothetical protein                                   | 0.556 |
| sll1271 | conserved hypothetical protein                                   | 0.392 |
| sll1306 | conserved hypothetical protein                                   | 0.487 |
| sll1367 | conserved hypothetical protein                                   | 0.656 |
| sll1825 | conserved hypothetical protein                                   | 0.429 |
| slr0083 | conserved hypothetical protein                                   | 0.626 |
| slr0551 | conserved hypothetical protein                                   | 0.555 |
| slr0809 | conserved hypothetical protein                                   | 0.613 |
| slr1104 | conserved hypothetical protein                                   | 0.664 |
| slr1179 | conserved hypothetical protein                                   | 0.666 |
| slr1203 | conserved hypothetical protein                                   | 0.662 |
| slr1260 | conserved hypothetical protein                                   | 0.354 |
| slr1815 | conserved hypothetical protein                                   | 0.403 |
| slr1908 | conserved hypothetical protein                                   | 0.636 |
| slr1926 | conserved hypothetical protein protein                           | 0.595 |
| sll1744 | cyanelle ribosomal protein L1                                    | 0.606 |
| sll1096 | cyanelle ribosomal protein S12                                   | 0.456 |
| ssr0482 | cyanelle ribosomal protein S16                                   | 0.607 |
| slr2002 | cyanophycin synthetase                                           | 0.612 |
| sll0813 | cytochrome c oxidase subunit II                                  | 0.511 |
| slr1379 | cytochrome d ubiquinol oxidase subunit I                         | 0.593 |
| sll1258 | Deoxycytidine triphosphate deaminase family protein              | 0.612 |

|                                                              |       |
|--------------------------------------------------------------|-------|
| slr2058 DNA topoisomerase i                                  | 0.615 |
| slr1265 DNA-directed RNA polymerase gamma chain              | 0.519 |
| sll1427 DO serine protease                                   | 0.588 |
| slr0839 ferrocyclase                                         | 0.583 |
| slr1233 fumarate reductase flavoprotein subunit              | 0.484 |
| slr1143 GGDEF family protein                                 | 0.589 |
| slr1238 glutathione synthetase                               | 0.563 |
| slr0884 glyceraldehyde 3-phosphate dehydrogenase 1           | 0.298 |
| sll0301 HglK                                                 | 0.426 |
| slr1259 homology to a plant EST:RICS2753A                    | 0.569 |
| sll1226 hoxH                                                 | 0.664 |
| sll1514 HspA                                                 | 0.522 |
| sll1221 hydrogenase subunit (hoxF)                           | 0.465 |
| sll1080 hypothetical 36.3 kd lipoprotein precursor, putative | 0.297 |
| sll0069 hypothetical protein                                 | 0.485 |
| sll0172 hypothetical protein                                 | 0.397 |
| sll0446 hypothetical protein                                 | 0.602 |
| sll0606 hypothetical protein                                 | 0.534 |
| sll0625 hypothetical protein                                 | 0.594 |
| sll0854 hypothetical protein                                 | 0.598 |
| sll0877 hypothetical protein                                 | 0.612 |
| sll0911 hypothetical protein                                 | 0.630 |
| sll1049 hypothetical protein                                 | 0.313 |
| sll1217 hypothetical protein                                 | 0.451 |
| sll1545 hypothetical protein                                 | 0.439 |
| sll1571 hypothetical protein                                 | 0.597 |
| sll1862 hypothetical protein                                 | 0.571 |
| slr0226 hypothetical protein                                 | 0.595 |
| slr0439 hypothetical protein                                 | 0.491 |
| slr0575 hypothetical protein                                 | 0.629 |
| slr0637 hypothetical protein                                 | 0.519 |
| slr0645 hypothetical protein                                 | 0.565 |
| slr0658 hypothetical protein                                 | 0.649 |
| slr0708 hypothetical protein                                 | 0.534 |
| slr0818 hypothetical protein                                 | 0.460 |
| slr1178 hypothetical protein                                 | 0.644 |
| slr1385 hypothetical protein                                 | 0.533 |
| slr1612 hypothetical protein                                 | 0.629 |
| slr1616 hypothetical protein                                 | 0.507 |
| slr1681 hypothetical protein                                 | 0.318 |
| slr1931 hypothetical protein                                 | 0.411 |
| slr1944 hypothetical protein                                 | 0.388 |
| slr1951 hypothetical protein                                 | 0.588 |
| slr2004 hypothetical protein                                 | 0.577 |
| slr2018 hypothetical protein                                 | 0.516 |
| slr2144 hypothetical protein                                 | 0.467 |
| ssl1918 hypothetical protein                                 | 0.310 |
| slr0721 malate oxidoreductase                                | 0.657 |



|         |                                                                       |       |
|---------|-----------------------------------------------------------------------|-------|
| sll1053 | membrane fusion protein mtrc precursor, putative                      | 0.488 |
| sll1294 | methyl-accepting chemotaxis protein, putative                         | 0.372 |
| slr0904 | Mg(2+) chelatase family protein                                       | 0.602 |
| sll0080 | N-acetyl-glutamate semialdehyde dehydrogenase ArgL                    | 0.595 |
| slr0891 | N-acetylmuramoyl-L-alanine amidase, putative, putative                | 0.658 |
| sll1453 | nitrate transporter protein (nrtD) homolog (cmpD)                     | 0.291 |
| sll1452 | nrtC-like transporter protein (cmpC)                                  | 0.451 |
| sll0002 | penicillin-binding protein 1                                          | 0.519 |
| sll1679 | periplasmic serine protease                                           | 0.588 |
| sll1196 | Pfk1                                                                  | 0.661 |
| sll0920 | phosphoenolpyruvate carboxylase                                       | 0.530 |
| sll0395 | phosphoglycerate mutase, putative                                     | 0.576 |
| slr1254 | phytoene dehydrogenase                                                | 0.650 |
| sll1694 | pilin                                                                 | 0.574 |
| slr0163 | pilin biogenesis protein                                              | 0.438 |
| slr0162 | pilin biogenesis protein-related                                      | 0.500 |
| sll1581 | polysaccharide export protein, putative, putative                     | 0.637 |
| sll2008 | processing protease, putative                                         | 0.477 |
| sll2009 | processing protease, putative                                         | 0.654 |
| slr0665 | putative aconitate hydratase                                          | 0.544 |
| slr0942 | putative alcohol dehydrogenase                                        | 0.589 |
| slr0370 | putative aldehyde dehydrogenase                                       | 0.620 |
| slr0051 | putative carbonic anhydrase                                           | 0.518 |
| sll1641 | putative glutamate decarboxylase                                      | 0.615 |
| sll0553 | putative protein                                                      | 0.646 |
| sll0175 | putative protein-related                                              | 0.577 |
| sll1440 | pyridoxamine 5-phosphate oxidase                                      | 0.589 |
| sll0741 | pyruvate-flavodoxin oxidoreductase                                    | 0.585 |
| sll0569 | reca protein                                                          | 0.639 |
| slr2100 | response regulator                                                    | 0.514 |
| sll1284 | serine esterase [Spirulina platensis, C1, Genomic, 827 nt].           | 0.499 |
| sll1027 | small subunit of NADH-dependent glutamate synthase                    | 0.594 |
| slr1841 | SomA                                                                  | 0.392 |
| slr2089 | squalene--hopene cyclase (ec 5.4.99.-)                                | 0.639 |
| sll0173 | streptogramin B lactonase, putative                                   | 0.335 |
| sll0837 | TprN                                                                  | 0.659 |
| slr0744 | translation initiation factor if-2                                    | 0.642 |
| sll1343 | Tricorn protease interacting factor F3, putative                      | 0.621 |
| slr0773 | TRK system potassium uptake protein, putative, putative               | 0.494 |
| slr1031 | tyrosyl-tRNA synthetase                                               | 0.636 |
| sll0764 | urea/short-chain amide ABC transporter, ATP-binding protein, putative | 0.337 |
| sll1750 | urease alpha subunit                                                  | 0.657 |
| sll0915 | zinc protease, putative                                               | 0.595 |

## **proteomic analysis**
